# Supplementary material for: Facile and economical synthesis for “plum pudding”-shaped porous LiFePO4/carbon composites for lithium ion batteries
Source: Royal Society of Chemistry journal article supplement (doi:10.1039/c4ra05342g), 2014-01-01
Supplement: c4ra05342g1.pdf [file c4ra05342g1.pdf]

## Electronic Supplementary Information (ESI)

### **Facile and economical synthesis for “Plum Pudding” shaped porous $\text{LiFePO}_4$ /carbon composites for lithium ion batteries**

Hairong Xue<sup>a</sup>, Jianqing Zhao<sup>b</sup>, Tao Wang<sup>c</sup>, Hu Guo<sup>a</sup>, Xiaoli Fan<sup>a</sup>, Jianping He<sup>a, \*</sup>

<sup>a</sup> College of Material Science and Technology, Nanjing University of Aeronautics and Astronautics, Yudao Street 29, 210016 Nanjing, PR China.

<sup>b</sup> Louisiana State University, Department of Mechanical and Industrial Engineering, Baton Rouge, LA 70803, United States.

<sup>c</sup> World Premier International Research Center for Materials Nanoarchitectonics, National Institute for Materials Science, 1-1 Namiki, Tsukuba, Ibaraki 305-0044, Japan.

\*Corresponding author. Tel: +86 25 52112900; Fax: +86 25 52112626.

E-mail address: [jianph@nuaa.edu.cn](mailto:jianph@nuaa.edu.cn) (J. P. He)

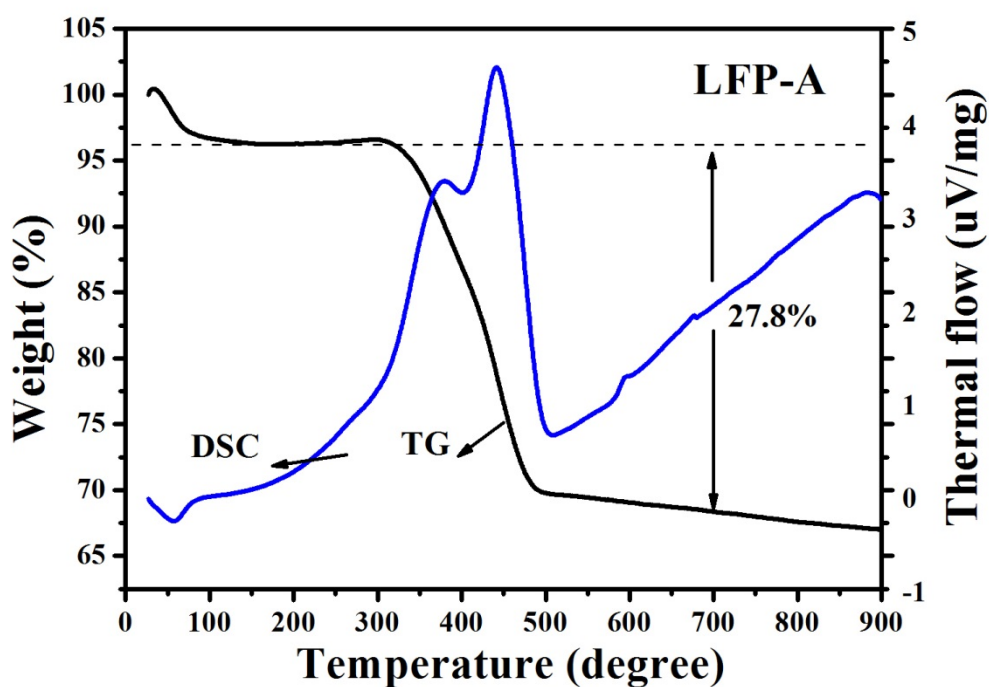

Fig.S1. TG/DSC patterns of TFP-A heated in oxygen from ambient to 900°C.

Calculation of carbon content: The TFP-A composite was sintered under flowing oxygen to completely remove the carbon component in a temperature range from room temperature to 900 °C. As a result, during TG measurement in oxygen, by taking into account the total mass loss of 27.8 % at 700 °C on the TG curve shown in Fig.S1 and theoretical weight gain (5.07%) of pure LiFePO<sub>4</sub>, the carbon content in the LiFePO<sub>4</sub>/C composite was calculated to be 31.2 % (

$$C_{WT}\% = 1 - \frac{1 - 27.8\%}{1 + 5.07\%} = 31.2\% \text{ ).}$$

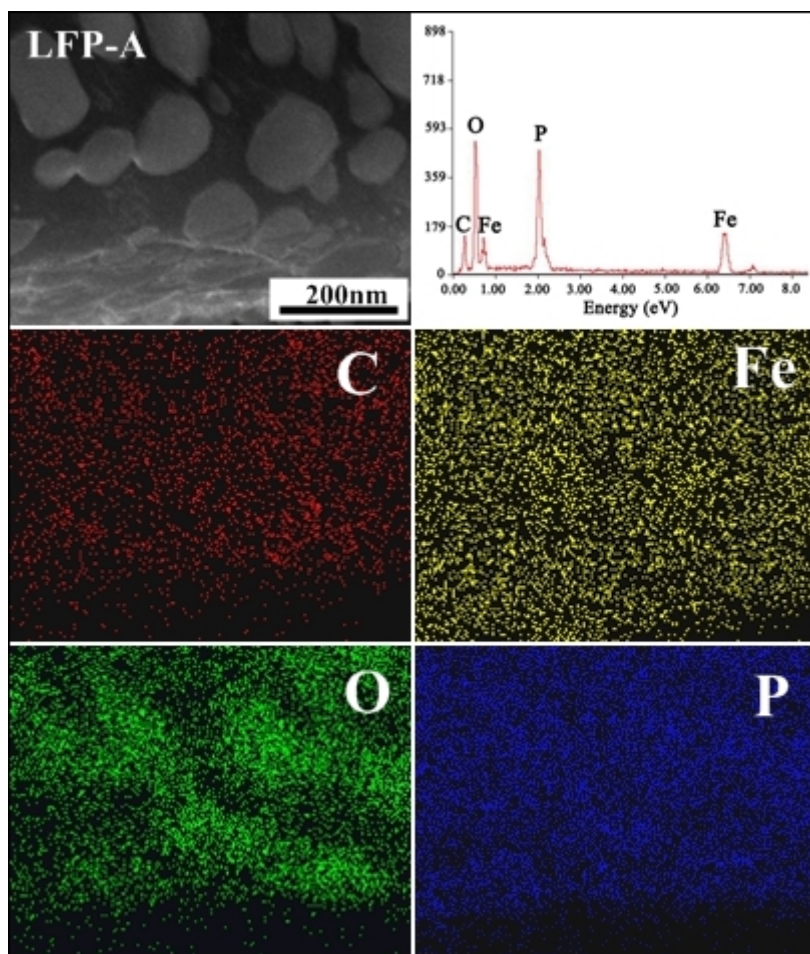

Fig.S2. SEM image of the LFP-A, EDS image and the corresponding elemental mappings of C, Fe, P and O.

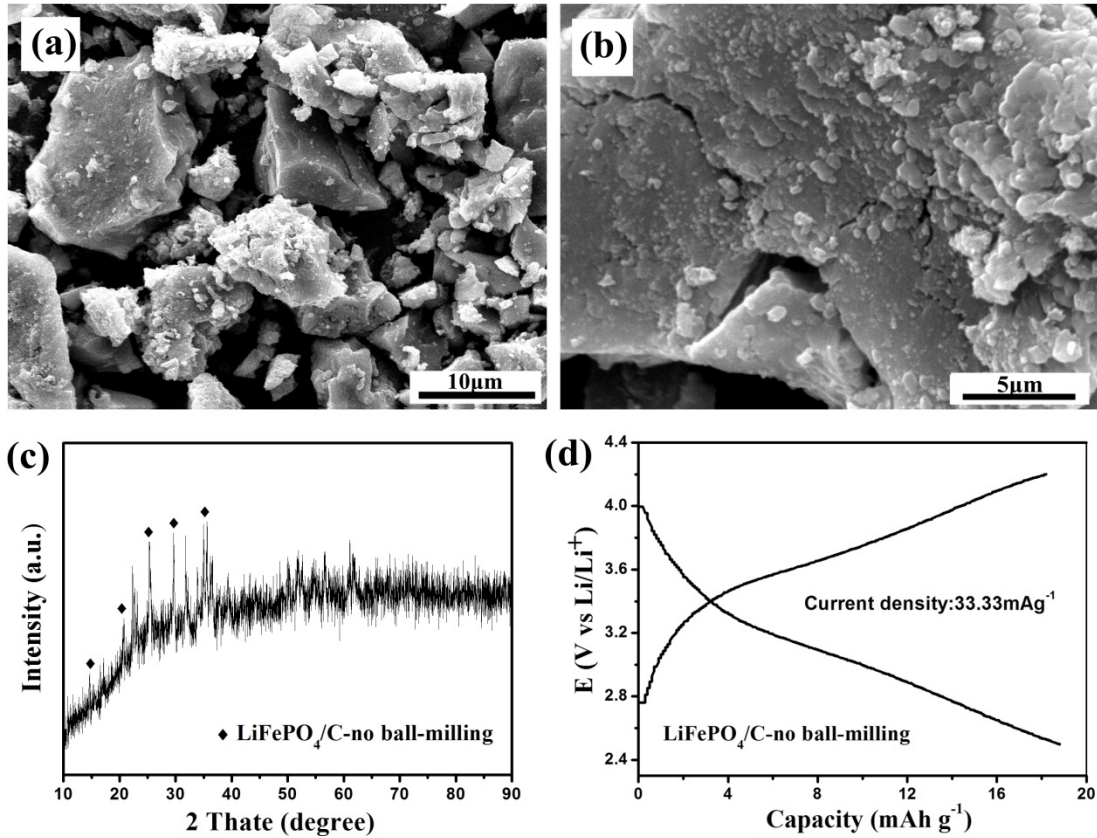

Fig.S3. (a, b) SEM and TEM images, (c) XRD-patterns and (d) first charge/discharge curves at 0.1 C of LiFePO<sub>4</sub>/C composite with no ball-milling.

In order to evaluate the important role of ball milling, we try to prepare the sample by hand grinding in the mortar without ball-milling, which was denoted as LFP-NBM. In addition, XRD、SEM and galvanostatic charge/discharge were provided to analyze the structure and electrochemical performance of LFP-NBM. As shown in SEM images in Fig. S3 (a) and (b), the LFP-NBM exhibits a larger particle size distribution and a serious agglomeration of LiFePO<sub>4</sub> particles. Moreover, the XRD pattern of LFP-NBM shown in Fig. S3 (c) shows many diffraction peaks of impurity phases except LiFePO<sub>4</sub>, and crystallinity is also very low. As a result, the first charge-discharge profiles of LFP-NBM at 0.1 C rate is shown in Fig. S3 (d), the LFP-A has a

poor discharge capacity of 19.3 mAh g<sup>-1</sup>. Therefore, oversimplified hand grinding of all precursors without ball-milling is adverse to improve performance of LiFePO<sub>4</sub>. Thus, we have revised this part electronic supplementary information.
